# Supplementary material for: Multicomponent Treatment in a Day Hospital for Adolescents: A Case of Good Practice
Source: Atypon-hosted journal article supplement (doi:10.1176/appi.ps.201600089), 2016-05-02
Supplement: appi.ps.201600089.ds001.pdf [file appi.ps.201600089.ds001.pdf]

Table 1. Descriptive parameters and significance of change of depression and functioning of adolescents

| <i>Evaluation</i>      | Beginning of treatment |       | End of Treatment |       | Change |       | t-test  | Sig.  |
|------------------------|------------------------|-------|------------------|-------|--------|-------|---------|-------|
|                        | M                      | SD    | M                | SD    | M      | SD    |         |       |
| PHQ-9/PHQ-A            | 14.11                  | 4.09  | 6.56             | 2.53  | -7.55  | 2.69  | -27.541 | 0.000 |
| GAF/CGAS               | 51.32                  | 12.52 | 77.16            | 10.04 | 25.83  | 10.81 | 25.404  | 0.000 |
| Treatment satisfaction |                        |       | 80.59            | 7.41  |        |       |         |       |

PHQ-9/PHQ-A – Patient Health Questionnaire / Patient Health Questionnaire modified for Adolescents; GAF/CGAS –Global Assessment of Functioning / Children’s Global Assessment Scale
